# Supplementary material for: Breastfeeding and impact on childhood hospital admissions: a nationwide birth cohort in South Korea
Source: PubMed Central journal article supplement (PMC10511528; doi:10.1038/s41467-023-41516-y), 2023-09-20
Supplement: 41467_2023_41516_MOESM1_ESM.pdf [file 41467_2023_41516_MOESM1_ESM.pdf]

## Supplementary information

### **Breastfeeding and impact on childhood hospital admissions: a nationwide birth cohort in South Korea**

Jeong-Seon Lee, MD,<sup>1</sup> Jae Il Shin, MD, PhD,<sup>2</sup> Sunyeup Kim, BS,<sup>3</sup> Yong Sung Choi, MD, PhD,<sup>4</sup> Youn Ho Shin, MD, PhD,<sup>5</sup> Jimin Hwang, MD,<sup>6</sup> Jung U Shin, MD, PhD,<sup>7</sup> Ai Koyanagi, MD, PhD,<sup>8</sup> Louis Jacob, MD, PhD,<sup>9</sup> Lee Smith, PhD,<sup>10</sup> Han Eol Jeong, PhD, MPH,<sup>11</sup> Yunha Noh, PharmD, PhD,<sup>11,19,20</sup> In-Sun Oh, PhD,<sup>11,19,20</sup> Sang Youl Rhee, MD,<sup>12</sup> Chanyang Min, PhD,<sup>12</sup> Seong Ho Cho, MD,<sup>13</sup> Steve Turner, MD,<sup>14</sup> Guillaume Fond, MD, PhD,<sup>15</sup> Laurent Boyer, MD, PhD,<sup>15</sup> Dong In Suh, MD,<sup>16</sup> Krishna Prasad Acharya, MD,<sup>17</sup> Ju-Young Shin, PhD,<sup>11,18</sup> Seung Won Lee, MD, PhD,<sup>3</sup> Dong Keon Yon, MD, PhD<sup>4,12</sup>

<sup>1</sup>Department of Pediatrics, Soonchunhyang University Bucheon Hospital, Soonchunhyang University School of Medicine, Bucheon, Republic of [Korea](#).

<sup>2</sup>Department of Pediatrics, Yonsei University College of Medicine, Seoul, Republic of [Korea](#).

<sup>3</sup>Department of Precision Medicine, Sungkyunkwan University School of Medicine, Suwon, Republic of [Korea](#).

<sup>4</sup>Department of Pediatrics, Kyung Hee University Medical Center, Kyung Hee University College of Medicine, Seoul, Republic of [Korea](#).

<sup>5</sup>Department of Pediatrics, The Catholic University of Korea, Yeouido St. Mary's Hospital, Seoul, Republic of [Korea](#).

<sup>6</sup>Department of Epidemiology, Johns Hopkins Bloomberg School of Public Health, Baltimore,

MD, [USA](#).

<sup>7</sup>Department of Dermatology, CHA Bundang Medical Center, CHA University School of Medicine, Seongnam, Republic of [Korea](#).

<sup>8</sup>Research and Development Unit, Parc Sanitari Sant Joan de Déu, CIBERSAM, ISCIII, Barcelona, [Spain](#).

<sup>9</sup>Department of Physical Medicine and Rehabilitation, Lariboisière-Fernand Widal Hospital, AP-HP, Université Paris Cité, Paris, [France](#).

<sup>10</sup>Centre for Health, Performance and Wellbeing, Anglia Ruskin University, Cambridge, [UK](#).

<sup>11</sup>School of Pharmacy, Sungkyunkwan University, Suwon, Republic of [Korea](#).

<sup>12</sup>Center for Digital Health, Medical Science Research Institute, Kyung Hee University Medical Center, Kyung Hee University College of Medicine, Seoul, Republic of [Korea](#).

<sup>13</sup>Division of Allergy-Immunology, University of South Florida Morsani College of Medicine, Tampa, FL, [USA](#).

<sup>14</sup>Maternity and Child Health Division, NHS Grampian, Aberdeen, [UK](#).

<sup>15</sup>CEReSS-Health Service Research and Quality of Life Center, Assistance Publique-Hopitaux de Marseille, Aix-Marseille University, Marseille, France.

<sup>16</sup>Department of Pediatrics, Seoul National University Hospital, Seoul National University College of Medicine, Seoul, Republic of [Korea](#).

<sup>17</sup>Animal Quarantine Office Kathmandu, Budhanilkantha, Kathmandu, Nepal.

<sup>18</sup>Department of Biohealth Regulatory Science, Sungkyunkwan University, Suwon, Republic of [Korea](#).

<sup>19</sup>Departments of Epidemiology, Biostatistics, and Occupational Health, McGill University, Montreal, Canada

<sup>20</sup>Centre for Clinical Epidemiology, Lady Davis Institute, Jewish General Hospital, Montreal, Canada

These authors contributed equally: Jeong-Seon Lee, Jae Il Shin, Sunyeup Kim, Yong Sung Choi.

These authors jointly supervised this work: Ju-Young Shin, Seung Won Lee, Dong Keon Yon.

**Supplementary Table 1 | Representativeness and justification of study participants**

| Category                                 | Justification                                                                                                                                                                                                                                                                                                                                                                                                                                                                                                                                                                                          |
|------------------------------------------|--------------------------------------------------------------------------------------------------------------------------------------------------------------------------------------------------------------------------------------------------------------------------------------------------------------------------------------------------------------------------------------------------------------------------------------------------------------------------------------------------------------------------------------------------------------------------------------------------------|
| Disease                                  | Any hospital admission [infection, non-infection respiratory, non-infection gastrointestinal tract, non-infection genitourinary tract, non-infection oral cavity, mental health, and injury (external)]                                                                                                                                                                                                                                                                                                                                                                                                |
| Special considerations related to        |                                                                                                                                                                                                                                                                                                                                                                                                                                                                                                                                                                                                        |
| Sex                                      | The hospital admission rate affects boys more than girls. Therefore, we performed additional stratification analysis.                                                                                                                                                                                                                                                                                                                                                                                                                                                                                  |
| Age                                      | The hospital admission rate in children is lower as age increases.                                                                                                                                                                                                                                                                                                                                                                                                                                                                                                                                     |
| Socioeconomic status                     | Socioeconomic status is an important determinant affecting the hospital admission rate.                                                                                                                                                                                                                                                                                                                                                                                                                                                                                                                |
| Race                                     | The hospital admission rate affects all races across the world with different social environment status among races.                                                                                                                                                                                                                                                                                                                                                                                                                                                                                   |
| Geography of urban-rural interaction     | Environmental factors may have a different impact on all health outcomes in urban and rural communities. Therefore, we performed additional stratification analysis.                                                                                                                                                                                                                                                                                                                                                                                                                                   |
| Other considerations                     | Throughout the world, hospital admissions vary widely within and among countries. They are associated with major comorbidities, including congenital anomalies, birth season, preterm birth, and low birth weight.                                                                                                                                                                                                                                                                                                                                                                                     |
| Overall representativeness of this study | We used a large representative sample (1.61 million children) and sophisticated statistical techniques to strengthen and generalize our main findings. This is largest analysis to evaluate protective breastfeeding effect of subsequent hospital admission and first analysis to focus on the lag time effect of subsequent hospital admission. We should determine whether the effect differs depending on when the individuals were born. Within each cohort, we compared the incidence rates of the primary outcome on those who were followed up for various periods (calendar period of birth). |

**Supplementary Table 2 | Distribution of hospital admissions by types of infant feeding, stratified by age at admission (unmatched cohort;  $n = 1,608,540$ )**

| Parameter                   | Exclusive breastfeeding |                                     | Partially breastfeeding |                                     | Fully formula feeding |                                     |
|-----------------------------|-------------------------|-------------------------------------|-------------------------|-------------------------------------|-----------------------|-------------------------------------|
|                             | Admission events        | Individuals with at least one event | Admission events        | Individuals with at least one event | Admission events      | Individuals with at least one event |
| Overall hospital admissions |                         |                                     |                         |                                     |                       |                                     |
| Overall                     | 413,815                 | 1,086,482                           | 211,617                 | 564,097                             | 428,589               | 1,245,224                           |
| <1 year                     | 243,932                 | 334,044                             | 129,612                 | 179,361                             | 271,070               | 397,013                             |
| 1-2 years                   | 201,103                 | 368,362                             | 103,237                 | 192,613                             | 219,940               | 432,391                             |
| 3-4 years                   | 125,540                 | 196,642                             | 63,633                  | 100,685                             | 132,930               | 218,978                             |
| 5-6 years                   | 84,229                  | 117,354                             | 41,884                  | 58,504                              | 87,726                | 126,453                             |
| 7-10 years                  | 49,344                  | 70,080                              | 22,903                  | 32,934                              | 47,688                | 70,389                              |
| Infection                   |                         |                                     |                         |                                     |                       |                                     |
| Overall                     | 302,304                 | 702,287                             | 153,977                 | 362,889                             | 323,451               | 819,899                             |
| <1 year                     | 117,877                 | 154,390                             | 60,928                  | 80,637                              | 138,784               | 193,444                             |
| 1-2 years                   | 169,892                 | 287,920                             | 87,842                  | 151,144                             | 188,669               | 339,843                             |
| 3-4 years                   | 96,284                  | 141,308                             | 49,105                  | 72,594                              | 103,320               | 158,604                             |
| 5-6 years                   | 58,006                  | 76,513                              | 29,211                  | 38,529                              | 62,256                | 84,509                              |
| 7-10 years                  | 31,897                  | 42,156                              | 15,106                  | 19,985                              | 31,993                | 43,499                              |
| Gastrointestinal tract      |                         |                                     |                         |                                     |                       |                                     |
| Overall                     | 113,930                 | 168,996                             | 57,030                  | 85,136                              | 124,745               | 194,507                             |
| <1 year                     | 27,821                  | 31,328                              | 14,506                  | 16,442                              | 34,312                | 39,793                              |
| 1-2 years                   | 51,130                  | 64,911                              | 25,856                  | 33,113                              | 57,720                | 75,735                              |
| 3-4 years                   | 30,637                  | 37,025                              | 15,357                  | 18,642                              | 33,322                | 41,219                              |
| 5-6 years                   | 18,349                  | 21,346                              | 9,009                   | 10,386                              | 19,590                | 23,150                              |
| 7-10 years                  | 12,013                  | 14,386                              | 5,413                   | 6,553                               | 11,866                | 14,610                              |
| Respiratory                 |                         |                                     |                         |                                     |                       |                                     |
| Overall                     | 19,556                  | 20,747                              | 9,805                   | 10,434                              | 19,559                | 20,973                              |
| <1 year                     | 460                     | 470                                 | 279                     | 285                                 | 702                   | 734                                 |
| 1-2 years                   | 2,350                   | 2,481                               | 1,296                   | 1,380                               | 2,867                 | 3,076                               |
| 3-4 years                   | 5,842                   | 6,080                               | 3,127                   | 3,236                               | 6,078                 | 6,325                               |
| 5-6 years                   | 7,885                   | 8,080                               | 3,773                   | 3,875                               | 7,438                 | 7,655                               |
| 7-10 years                  | 3,521                   | 3,636                               | 1,592                   | 1,658                               | 3,067                 | 3,183                               |
| Genitourinary tract         |                         |                                     |                         |                                     |                       |                                     |
| Overall                     | 3,394                   | 3,661                               | 1,947                   | 2,129                               | 4,103                 | 4,496                               |
| <1 year                     | 1,381                   | 1,449                               | 826                     | 867                                 | 1,795                 | 1,880                               |
| 1-2 years                   | 800                     | 834                                 | 468                     | 500                                 | 974                   | 1,029                               |
| 3-4 years                   | 546                     | 578                                 | 310                     | 328                                 | 701                   | 776                                 |
| 5-6 years                   | 415                     | 449                                 | 229                     | 254                                 | 433                   | 461                                 |
| 7-10 years                  | 321                     | 351                                 | 155                     | 180                                 | 307                   | 350                                 |
| Oral cavity                 |                         |                                     |                         |                                     |                       |                                     |
| Overall                     | 947                     | 978                                 | 483                     | 496                                 | 1,079                 | 1,107                               |
| <1 year                     | 117                     | 119                                 | 62                      | 62                                  | 169                   | 170                                 |
| 1-2 years                   | 309                     | 314                                 | 172                     | 174                                 | 363                   | 370                                 |
| 3-4 years                   | 175                     | 178                                 | 106                     | 109                                 | 216                   | 220                                 |
| 5-6 years                   | 210                     | 214                                 | 84                      | 88                                  | 208                   | 214                                 |
| 7-10 years                  | 146                     | 153                                 | 62                      | 63                                  | 131                   | 133                                 |
| Mental health               |                         |                                     |                         |                                     |                       |                                     |
| Overall                     | 158                     | 343                                 | 80                      | 185                                 | 203                   | 289                                 |
| <1 year                     | 11                      | 11                                  | 5                       | 5                                   | 8                     | 8                                   |
| 1-2 years                   | 26                      | 26                                  | 13                      | 17                                  | 33                    | 33                                  |
| 3-4 years                   | 26                      | 49                                  | 12                      | 37                                  | 47                    | 58                                  |
| 5-6 years                   | 43                      | 99                                  | 22                      | 60                                  | 51                    | 59                                  |
| 7-10 years                  | 57                      | 158                                 | 34                      | 66                                  | 65                    | 131                                 |
| Injury/External             |                         |                                     |                         |                                     |                       |                                     |
| Overall                     | 23,101                  | 26,014                              | 11,280                  | 12,648                              | 21,845                | 24,604                              |
| <1 year                     | 4,925                   | 5,065                               | 2,559                   | 2,652                               | 5,026                 | 5,231                               |
| 1-2 years                   | 5,032                   | 5,490                               | 2,538                   | 2,757                               | 4,845                 | 5,250                               |
| 3-4 years                   | 4,444                   | 4,930                               | 2,132                   | 2,312                               | 4,214                 | 4,630                               |
| 5-6 years                   | 4,555                   | 5,065                               | 2,163                   | 2,425                               | 4,208                 | 4,667                               |
| 7-10 years                  | 4,824                   | 5,464                               | 2,200                   | 2,502                               | 4,187                 | 4,826                               |

**Supplementary Table 3 | Sociodemographic characteristics of participants in the 1:1 propensity-score-matched cohort ( $n = 1,201,976$ )**

| Characteristic                           | Full unmatched cohort (total) | 1:1 propensity-score-matched cohort |                       | SMD <sup>a</sup> |
|------------------------------------------|-------------------------------|-------------------------------------|-----------------------|------------------|
|                                          |                               | Exclusive breastfeeding             | Fully formula feeding |                  |
| Total, $n$ (%)                           | 1,608,540 (100.0)             | 600,988                             | 600,988               |                  |
| <b>Baseline characteristics</b>          |                               |                                     |                       |                  |
| Infant sex, $n$ (%)                      |                               |                                     |                       | 0.069            |
| Female                                   | 799,939 (49.7)                | 285,232 (47.5)                      | 305,844 (50.9)        |                  |
| Male                                     | 808,601 (50.3)                | 315,756 (52.5)                      | 295,144 (49.1)        |                  |
| Calendar period of birth, $n$ (%)        |                               |                                     |                       | 0.09             |
| 2008-2010                                | 599,277 (37.3)                | 239,845 (39.9)                      | 214,081 (35.6)        |                  |
| 2011-2012                                | 490,989 (30.5)                | 176,765 (29.4)                      | 185,008 (30.8)        |                  |
| 2013-2015                                | 518,274 (32.2)                | 184,378 (30.7)                      | 201,899 (33.6)        |                  |
| Birth season                             |                               |                                     |                       | 0.058            |
| Spring (March–May)                       | 401,371 (25.0)                | 156,064 (26.0)                      | 150,835 (25.1)        |                  |
| Summer (June–August)                     | 362,642 (22.5)                | 145,722 (24.2)                      | 135,158 (22.5)        |                  |
| Autumn (September–November)              | 416,415 (25.9)                | 143,334 (23.8)                      | 155,050 (25.8)        |                  |
| Winter (December–February)               | 428,112 (26.6)                | 155,868 (25.9)                      | 159,945 (26.6)        |                  |
| Region of residence, $n$ (%)             |                               |                                     |                       | 0.03             |
| Rural                                    | 877,118 (54.5)                | 341,412 (56.8)                      | 332,474 (55.3)        |                  |
| Urban                                    | 731,422 (45.5)                | 259,576 (43.2)                      | 268,514 (44.7)        |                  |
| Household income, $n$ (%)                |                               |                                     |                       | 0.038            |
| High (70–100th percentile)               | 684,264 (42.5)                | 261,606 (43.5)                      | 250,626 (41.7)        |                  |
| Middle (30–69th percentile)              | 660,916 (41.1)                | 243,423 (40.5)                      | 249,392 (41.5)        |                  |
| Low (0–29th percentile)                  | 263,360 (16.4)                | 95,959 (16.0)                       | 100,970 (16.8)        |                  |
| Preterm birth, $\leq 36$ week, $n$ (%)   | 33,294 (2.1)                  | 7,407 (1.2)                         | 7,417 (1.2)           | <0.001           |
| Low birth weight, $\leq 2499$ g, $n$ (%) | 26,001 (1.6)                  | 5,451 (0.9)                         | 5,423 (0.9)           | <0.001           |

*SMD* standardized mean differences.

<sup>a</sup>An SMD of <0.1 indicates no major imbalance. All SMD values were <0.07 in each propensity-score-matched cohort.

**Supplementary Table 4 | Statistical model to determine the relationship between types of infant feeding and overall hospital admissions (1:1 propensity-score-matched cohort;  $n = 1,201,976$ )**

| Parameter                            | Individuals with at least one event | Admission events | Person-years | Incidence rate of admission events <sup>a</sup> | Incidence rate ratio of admission events (95% CI) |                            |
|--------------------------------------|-------------------------------------|------------------|--------------|-------------------------------------------------|---------------------------------------------------|----------------------------|
|                                      |                                     |                  |              |                                                 | Minimally-adjusted <sup>b</sup>                   | Adjusted <sup>c</sup>      |
| Feeding types (overall)              |                                     |                  |              |                                                 |                                                   |                            |
| Fully formula feeding                | 406,107                             | 1,175,203        | 4,769,116.5  | 24.64                                           | 1.0 (reference)                                   | 1.0 (reference)            |
| Exclusive breastfeeding              | 379,525                             | 994,951          | 4,883,566.6  | 20.37                                           | <b>0.85 (0.84 to 0.85)</b>                        | <b>0.85 (0.85 to 0.85)</b> |
| Male                                 |                                     |                  |              |                                                 |                                                   |                            |
| Fully formula feeding                | 213,530                             | 631,121          | 2,436,212.8  | 25.91                                           | 1.0 (reference)                                   | 1.0 (reference)            |
| Exclusive breastfeeding              | 187,157                             | 503,197          | 2,316,294.5  | 21.72                                           | <b>0.86 (0.85 to 0.86)</b>                        | <b>0.85 (0.85 to 0.86)</b> |
| Female                               |                                     |                  |              |                                                 |                                                   |                            |
| Fully formula feeding                | 192,577                             | 544,082          | 2,332,903.7  | 23.32                                           | 1.0 (reference)                                   | 1.0 (reference)            |
| Exclusive breastfeeding              | 192,368                             | 491,754          | 2,567,272.1  | 19.15                                           | <b>0.85 (0.84 to 0.85)</b>                        | <b>0.85 (0.85 to 0.86)</b> |
| Calendar period of birth (2008-2010) |                                     |                  |              |                                                 |                                                   |                            |
| Fully formula feeding                | 144,105                             | 426,336          | 2,099,897.5  | 20.30                                           | 1.0 (reference)                                   | 1.0 (reference)            |
| Exclusive breastfeeding              | 151,271                             | 401,759          | 2,356,973.8  | 17.05                                           | <b>0.84 (0.84 to 0.85)</b>                        | <b>0.85 (0.85 to 0.86)</b> |
| Calendar period of birth (2011-2012) |                                     |                  |              |                                                 |                                                   |                            |
| Fully formula feeding                | 126,302                             | 371,959          | 1,475,907.4  | 25.20                                           | 1.0 (reference)                                   | 1.0 (reference)            |
| Exclusive breastfeeding              | 112,614                             | 299,405          | 1,416,770.8  | 21.13                                           | <b>0.84 (0.84 to 0.85)</b>                        | <b>0.85 (0.84 to 0.85)</b> |
| Calendar period of birth (2013-2015) |                                     |                  |              |                                                 |                                                   |                            |
| Fully formula feeding                | 135,700                             | 376,908          | 1,193,311.6  | 31.59                                           | 1.0 (reference)                                   | 1.0 (reference)            |
| Exclusive breastfeeding              | 115,640                             | 293,787          | 1,109,822.0  | 26.47                                           | <b>0.85 (0.85 to 0.86)</b>                        | <b>0.85 (0.85 to 0.86)</b> |
| Rural                                |                                     |                  |              |                                                 |                                                   |                            |
| Fully formula feeding                | 225,655                             | 664,202          | 2,630,075.0  | 25.25                                           | 1.0 (reference)                                   | 1.0 (reference)            |
| Exclusive breastfeeding              | 216,393                             | 574,382          | 2,763,128.1  | 20.79                                           | <b>0.84 (0.84 to 0.85)</b>                        | <b>0.85 (0.84 to 0.85)</b> |
| Urban                                |                                     |                  |              |                                                 |                                                   |                            |
| Fully formula feeding                | 180,452                             | 511,001          | 2,139,041.5  | 23.89                                           | 1.0 (reference)                                   | 1.0 (reference)            |
| Exclusive breastfeeding              | 163,132                             | 420,569          | 2,120,438.5  | 19.83                                           | <b>0.85 (0.85 to 0.86)</b>                        | <b>0.86 (0.85 to 0.86)</b> |

CI confidence interval.

<sup>a</sup>Hospital admission rate is expressed as per 100 person-years.

<sup>b</sup>Adjusted model: adjusted for infant sex and calendar period of birth (2008-2010, 2011-2012, and 2013-2015).

<sup>c</sup>Adjusted model: adjusted for infant sex, calendar period of birth (2008-2010, 2011-2012, and 2013-2015), birth season (spring, summer, autumn, and winter), region of residence (rural and urban), household income (high, middle, and low), preterm birth, and low birth weight.

We performed the negative binomial regression model (endpoint, incidence rate of any hospital admission) with incidence rate ratios and 95% CIs.

Numbers in bold indicate significant differences (two sided  $p < 0.05$ ).

**Supplementary Table 5 | Hospital admissions during childhood by types of infant feeding, stratified by age at admission (1:1 propensity-score-matched cohort;  $n = 1,201,976$ )**

| Parameter               | Individuals with at least one event | Admission events | Person-years | Incidence rate of admission events <sup>a</sup> | IRR of admission events (95% CI) |                            |
|-------------------------|-------------------------------------|------------------|--------------|-------------------------------------------------|----------------------------------|----------------------------|
|                         |                                     |                  |              |                                                 | Sex-adjusted                     | Adjusted <sup>b</sup>      |
| <b>&lt;1 year</b>       |                                     |                  |              |                                                 |                                  |                            |
| Fully formula feeding   | 251,133                             | 365,883          | 600,958.0    | 60.88                                           | 1.0 (reference)                  | 1.0 (reference)            |
| Exclusive breastfeeding | 224,725                             | 307,949          | 600,959.1    | 51.24                                           | <b>0.84 (0.84 to 0.85)</b>       | <b>0.85 (0.85 to 0.86)</b> |
| <b>1-2 years</b>        |                                     |                  |              |                                                 |                                  |                            |
| Fully formula feeding   | 209,925                             | 411,110          | 1,201,662.6  | 34.21                                           | 1.0 (reference)                  | 1.0 (reference)            |
| Exclusive breastfeeding | 184,351                             | 337,506          | 1,201,660.9  | 28.09                                           | <b>0.82 (0.82 to 0.83)</b>       | <b>0.83 (0.83 to 0.84)</b> |
| <b>3-4 years</b>        |                                     |                  |              |                                                 |                                  |                            |
| Fully formula feeding   | 127,065                             | 208,735          | 1,200,571.0  | 17.39                                           | 1.0 (reference)                  | 1.0 (reference)            |
| Exclusive breastfeeding | 114,733                             | 179,538          | 1,200,833.7  | 14.95                                           | <b>0.86 (0.85 to 0.87)</b>       | <b>0.87 (0.86 to 0.88)</b> |
| <b>5-6 years</b>        |                                     |                  |              |                                                 |                                  |                            |
| Fully formula feeding   | 83,846                              | 120,722          | 982,695.3    | 12.28                                           | 1.0 (reference)                  | 1.0 (reference)            |
| Exclusive breastfeeding | 76,689                              | 106,586          | 1,021,558.4  | 10.43                                           | <b>0.88 (0.87 to 0.89)</b>       | <b>0.88 (0.87 to 0.89)</b> |
| <b>7-10 years</b>       |                                     |                  |              |                                                 |                                  |                            |
| Fully formula feeding   | 46,608                              | 68,753           | 783,229.7    | 8.78                                            | 1.0 (reference)                  | 1.0 (reference)            |
| Exclusive breastfeeding | 44,597                              | 63,372           | 858,554.6    | 7.38                                            | <b>0.92 (0.91 to 0.94)</b>       | <b>0.86 (0.85 to 0.88)</b> |

IRR incidence rate ratio, CI confidence interval.

<sup>a</sup>Hospital admission rate is expressed as per 100 person-years.

<sup>b</sup>Adjusted model: adjusted for infant sex, calendar period of birth (2008-2010, 2011-2012, and 2013-2015), birth season (spring, summer, autumn, and winter), region of residence (rural and urban), household income (high, middle, and low), preterm birth, and low birth weight.

We performed the negative binomial regression model (endpoint, incidence rate of any hospital admission) with incidence rate ratios and 95% CIs.

Numbers in bold indicate significant differences (two sided  $p < 0.05$ ).



**Supplementary Table 6 | Relationship of types of infant feeding with subsequent hospital admissions, stratified by cause of morbidity in the 1:1 propensity-score-matched cohort ( $n = 1,201,976$ )**

| Parameter               | IRR of admission events (95% CI) |                            |
|-------------------------|----------------------------------|----------------------------|
|                         | Sex-adjusted                     | Adjusted <sup>a</sup>      |
| Infection               |                                  |                            |
| Fully formula feeding   | 1.0 (reference)                  | 1.0 (reference)            |
| Exclusive breastfeeding | <b>0.83 (0.82 to 0.83)</b>       | <b>0.83 (0.83 to 0.84)</b> |
| Respiratory             |                                  |                            |
| Fully formula feeding   | 1.0 (reference)                  | 1.0 (reference)            |
| Exclusive breastfeeding | <b>0.94 (0.92 to 0.96)</b>       | <b>0.93 (0.91 to 0.95)</b> |
| Gastrointestinal tract  |                                  |                            |
| Fully formula feeding   | 1.0 (reference)                  | 1.0 (reference)            |
| Exclusive breastfeeding | <b>0.84 (0.83 to 0.84)</b>       | <b>0.84 (0.83 to 0.84)</b> |
| Oral cavity             |                                  |                            |
| Fully formula feeding   | 1.0 (reference)                  | 1.0 (reference)            |
| Exclusive breastfeeding | <b>0.85 (0.78 to 0.93)</b>       | <b>0.84 (0.77 to 0.92)</b> |
| Mental health           |                                  |                            |
| Fully formula feeding   | 1.0 (reference)                  | 1.0 (reference)            |
| Exclusive breastfeeding | 1.09 (0.84 to 1.43)              | 1.11 (0.85 to 1.45)        |
| Injury/External         |                                  |                            |
| Fully formula feeding   | 1.0 (reference)                  | 1.0 (reference)            |
| Exclusive breastfeeding | 1.01 (0.99 to 1.03)              | 1.00 (0.98 to 1.02)        |
| Genitourinary tract     |                                  |                            |
| Fully formula feeding   | 1.0 (reference)                  | 1.0 (reference)            |
| Exclusive breastfeeding | <b>0.78 (0.75 to 0.82)</b>       | <b>0.80 (0.76 to 0.84)</b> |

*IRR* incidence rate ratio, *CI* confidence interval.

<sup>a</sup>Adjusted model: adjusted for infant sex, calendar period of birth (2008-2010, 2011-2012, and 2013-2015), birth season (spring, summer, autumn, and winter), region of residence (rural and urban), household income (high, middle, and low), preterm birth, and low birth weight.

We performed the negative binomial regression model (endpoint, incidence rate of any hospital admission) with incidence rate ratios and 95% CIs.

Numbers in bold indicate significant differences (two sided  $p < 0.05$ ).

**Supplementary Table 7 | Hospital admissions during childhood by types of infant feeding, stratified by age at admission and cause of morbidity in the 1:1 propensity-score-matched cohort ( $n = 1,201,976$ )**

|                                    | Age at admission, years       |                               |                               |                               |                               |
|------------------------------------|-------------------------------|-------------------------------|-------------------------------|-------------------------------|-------------------------------|
|                                    | <1 years                      | 1-2 years                     | 3-4 years                     | 5-6 years                     | 7-10 years                    |
| Infection                          |                               |                               |                               |                               |                               |
| Sex-adjusted IRR (95% CI)          | <b>0.787 (0.781 to 0.794)</b> | <b>0.815 (0.809 to 0.821)</b> | <b>0.853 (0.845 to 0.862)</b> | <b>0.862 (0.851 to 0.873)</b> | <b>0.898 (0.882 to 0.914)</b> |
| Adjusted IRR <sup>a</sup> (95% CI) | <b>0.794 (0.787 to 0.801)</b> | <b>0.827 (0.821 to 0.833)</b> | <b>0.862 (0.853 to 0.871)</b> | <b>0.857 (0.846 to 0.868)</b> | <b>0.843 (0.828 to 0.858)</b> |
| Respiratory                        |                               |                               |                               |                               |                               |
| Sex-adjusted IRR (95% CI)          | <b>0.614 (0.542 to 0.696)</b> | <b>0.768 (0.726 to 0.811)</b> | <b>0.912 (0.879 to 0.946)</b> | 0.999 (0.966 to 1.033)        | 1.065 (1.014 to 1.119)        |
| Adjusted IRR <sup>a</sup> (95% CI) | <b>0.629 (0.555 to 0.712)</b> | <b>0.783 (0.738 to 0.830)</b> | <b>0.925 (0.890 to 0.960)</b> | <b>0.965 (0.965 to 0.965)</b> | 1.007 (0.957 to 1.059)        |
| Gastrointestinal tract             |                               |                               |                               |                               |                               |
| Sex-adjusted IRR (95% CI)          | <b>0.766 (0.753 to 0.780)</b> | <b>0.829 (0.818 to 0.841)</b> | <b>0.860 (0.846 to 0.875)</b> | <b>0.878 (0.859 to 0.898)</b> | <b>0.914 (0.888 to 0.940)</b> |
| Adjusted IRR <sup>a</sup> (95% CI) | <b>0.773 (0.760 to 0.787)</b> | <b>0.834 (0.823 to 0.845)</b> | <b>0.867 (0.853 to 0.883)</b> | <b>0.869 (0.850 to 0.889)</b> | <b>0.850 (0.827 to 0.875)</b> |
| Oral cavity                        |                               |                               |                               |                               |                               |
| Sex-adjusted IRR (95% CI)          | <b>0.694 (0.544 to 0.886)</b> | <b>0.827 (0.708 to 0.966)</b> | <b>0.771 (0.628 to 0.947)</b> | 0.971 (0.800 to 1.179)        | 1.008 (0.784 to 1.295)        |
| Adjusted IRR <sup>a</sup> (95% CI) | <b>0.694 (0.542 to 0.890)</b> | <b>0.823 (0.703 to 0.965)</b> | <b>0.769 (0.624 to 0.948)</b> | 0.972 (0.797 to 1.186)        | 0.951 (0.740 to 1.222)        |
| Mental health                      |                               |                               |                               |                               |                               |
| Sex-adjusted IRR (95% CI)          | 2.000 (0.684 to 5.851)        | 0.727 (0.430 to 1.230)        | 0.833 (0.464 to 1.496)        | 1.526 (0.910 to 2.560)        | 1.069 (0.645 to 1.773)        |
| Adjusted IRR <sup>a</sup> (95% CI) | 1.988 (0.678 to 5.826)        | 0.748 (0.441 to 1.266)        | <b>0.858 (0.858 to 0.858)</b> | 1.265 (0.747 to 2.143)        | 1.003 (0.493 to 2.040)        |
| Injury/External                    |                               |                               |                               |                               |                               |
| Sex-adjusted IRR (95% CI)          | <b>0.956 (0.919 to 0.995)</b> | 1.008 (0.969 to 1.048)        | 1.014 (0.972 to 1.057)        | 1.030 (0.989 to 1.074)        | 1.040 (0.999 to 1.082)        |
| Adjusted IRR <sup>a</sup> (95% CI) | 0.972 (0.932 to 1.013)        | 1.020 (0.978 to 1.065)        | 1.019 (0.974 to 1.067)        | 1.023 (0.978 to 1.071)        | 0.979 (0.935 to 1.024)        |
| Genitourinary tract                |                               |                               |                               |                               |                               |
| Sex-adjusted IRR (95% CI)          | <b>0.737 (0.687 to 0.792)</b> | <b>0.788 (0.714 to 0.870)</b> | <b>0.728 (0.646 to 0.822)</b> | 0.910 (0.787 to 1.051)        | 0.927 (0.782 to 1.099)        |
| Adjusted IRR <sup>a</sup> (95% CI) | <b>0.770 (0.715 to 0.829)</b> | <b>0.814 (0.737 to 0.899)</b> | <b>0.739 (0.655 to 0.834)</b> | 0.910 (0.787 to 1.052)        | 0.866 (0.730 to 1.027)        |

IRR incidence rate ratio, CI confidence interval.

<sup>a</sup>Adjusted model: adjusted for infant sex, calendar period of birth (2008-2010, 2011-2012, and 2013-2015), birth season (spring, summer, autumn, and winter), region of residence (rural and urban), household income (high, middle, and low), preterm birth, and low birth weight.

We performed the negative binomial regression model (endpoint, incidence rate of any hospital admission) with incidence rate ratios and 95% CIs.

Numbers in bold indicate significant differences (two sided  $p < 0.05$ ).

## Supplementary Table 8 | ICD-10 code tables

| Covariates | ICD-10 code                                                                                                                                                                                                                                                                                                                                                                                                                                                                                                                                                                                                                                                                                                                                                                                                                                                                                                                                                                                                                                                                                                                                                                                                                                                                                                                                                                                                                                                |
|------------|------------------------------------------------------------------------------------------------------------------------------------------------------------------------------------------------------------------------------------------------------------------------------------------------------------------------------------------------------------------------------------------------------------------------------------------------------------------------------------------------------------------------------------------------------------------------------------------------------------------------------------------------------------------------------------------------------------------------------------------------------------------------------------------------------------------------------------------------------------------------------------------------------------------------------------------------------------------------------------------------------------------------------------------------------------------------------------------------------------------------------------------------------------------------------------------------------------------------------------------------------------------------------------------------------------------------------------------------------------------------------------------------------------------------------------------------------------|
|            | A02.1 Salmonella sepsis<br>A17.0 Tuberculous meningitis<br>A17.1 Meningeal tuberculoma<br>A17.8 Other tuberculosis of nervous system<br>A17.9 Tuberculosis of nervous system, unspecified<br>A18.0 Tuberculosis of bones and joints<br>A19.0 Acute miliary tuberculosis of a single specified site<br>A19.1 Acute miliary tuberculosis of multiple sites<br>A20.3 Plague meningitis<br>A20.7 Septicemic plague<br>A21.7 Generalized tularaemia<br>A22.7 Anthrax sepsis<br>A23.0 Brucellosis due to Brucella melitensis<br>A23.1 Brucellosis due to Brucella abortus<br>A23.2 Brucellosis due to Brucella suis<br>A23.3 Brucellosis due to Brucella canis<br>A23.8 Other brucellosis<br>A23.9 Brucellosis, unspecified<br>A24.1 Acute and fulminating melioidosis<br>A25.0 Spirillosis<br>A25.1 Streptobacillosis<br>A25.9 Rat-bite fever, unspecified<br>A32.1 Listerial meningitis and meningoencephalitis<br>A32.7 Listerial sepsis<br>A39.0 Meningococcal meningitis<br>A39.1 Waterhouse-Friderichsen syndrome<br>A39.2 Acute meningococcaemia<br>A39.3 Chronic meningococcaemia<br>A39.4 Meningococemia, unspecified<br>A39.5 Meningococcal heart disease<br>A39.8 Other meningococcal infections<br>A39.8 Other meningococcal infections<br>A39.9 Meningococcal infection, unspecified                                                                                                                                                                |
| Infection  | A40.0 Sepsis due to streptococcus, group A<br>A40.1 Sepsis due to streptococcus, group B<br>A40.2 Sepsis due to streptococcus, group D<br>A40.3 Sepsis due to Streptococcus pneumoniae<br>A40.8 Other streptococcal sepsis<br>A40.9 Streptococcal sepsis, unspecified<br>A41.0 Sepsis due to Staphylococcus aureus<br>A41.1 Sepsis due to other specified staphylococcus<br>A41.2 Sepsis due to unspecified staphylococcus<br>A41.3 Sepsis due to Hemophilus influenzae<br>A41.4 Sepsis due to anaerobes<br>A41.51 Sepsis due to Escherichia coli [E. Coli]<br>A41.52 Sepsis due to Pseudomonas<br>A41.58 Sepsis due to other Gram-negative organisms<br>A41.8 Other specified septicaemia<br>A41.9 Sepsis, unspecified<br>A44.0 Systemic bartonellosis<br>A48.3 Toxic shock syndrome<br>A52.0 Cardiovascular syphilis<br>A52.1 Symptomatic neurosyphilis<br>A52.1 (no description found)<br>A52.2 Asymptomatic neurosyphilis<br>A52.3 Neurosyphilis, unspecified<br>A52.7 Other symptomatic late syphilis<br>A52.7 (no description found)<br>A52.8 Late syphilis, latent<br>A65 Nonvenereal syphilis<br>A74.0 Chlamydial conjunctivitis<br>A74.8 Other chlamydial diseases<br>A78 Q fever<br>A79.0 Trench fever<br>A79.1 Rickettsialpox due to Rickettsia akari<br>A79.8 Other specified rickettsioses<br>A79.9 Rickettsiosis, unspecified<br>B95.1 Streptococcus, group B, as the cause of diseases classified elsewhere<br>G00.0 Haemophilus meningitis |

---

G00.1 Pneumococcal meningitis  
G00.1 (no description found)  
G00.2 Streptococcal meningitis  
G00.3 Staphylococcal meningitis  
G00.8 Other bacterial meningitis  
G00.9 Bacterial meningitis, unspecified  
G01 Meningitis in bacterial diseases classified elsewhere  
G03.1 Chronic meningitis  
G05.0 Encephalitis, myelitis and encephalomyelitis in bacterial diseases classified elsewhere  
G06.0 Intracranial abscess and granuloma  
G06.1 Intraspinous abscess and granuloma  
G06.2 Extradural and subdural abscess, unspecified  
G07 Intracranial and intraspinal abscess and granuloma in disease classified elsewhere  
I30.1 Infective pericarditis  
I32.0 Pericarditis in bacterial diseases classified elsewhere  
I33.0 Acute and subacute infective endocarditis  
I41.0 Myocarditis in bacterial diseases classified elsewhere  
J39.0 Retropharyngeal and parapharyngeal abscess  
J39.1 Other abscess of pharynx  
J85.3 Abscess of mediastinum  
M00.90 Pyogenic arthritis, unspecified, multiple sites  
M00.91 Pyogenic arthritis, unspecified, shoulder region  
M00.92 Pyogenic arthritis, unspecified, upper arm  
M00.93 Pyogenic arthritis, unspecified, forearm  
M00.94 Pyogenic arthritis, unspecified, hand  
M00.95 Pyogenic arthritis, unspecified, pelvic region and thigh  
M00.96 Pyogenic arthritis, unspecified, lower leg  
M00.97 Pyogenic arthritis, unspecified, ankle and foot  
M00.98 Pyogenic arthritis, unspecified, other site  
M00.99 Pyogenic arthritis, unspecified, site unspecified  
M01.0 Meningococcal arthritis  
M01.1 Tuberculous arthritis  
M46.2 Osteomyelitis of vertebra  
M46.3 Infection of intervertebral disc (pyogenic)  
M46.4 Discitis, unspecified  
M46.5 Other infective spondylopathies  
M49.0 Tuberculosis of spine  
M49.1 Brucella spondylitis  
M49.2 Enterobacterial spondylitis  
M49.3 Spondylopathy in other infectious and parasitic diseases classified elsewhere  
M72.6 Necrotizing fasciitis  
M73.0 Gonococcal bursitis  
M73.1 Syphilitic bursitis  
M86.0 Acute haematogenous osteomyelitis  
M86.10 Other acute osteomyelitis, unspecified site  
M86.11 Other acute osteomyelitis, shoulder region  
M86.12 Other acute osteomyelitis, upper arm  
M86.13 Other acute osteomyelitis, forearm  
M86.14 Other acute osteomyelitis, hand  
M86.15 Other acute osteomyelitis, pelvic region and thigh  
M86.16 Other acute osteomyelitis, lower leg  
M86.17 Other acute osteomyelitis, ankle and foot  
M86.18 Other acute osteomyelitis, other site  
M86.19 Other acute osteomyelitis, multiple sites  
M86.2 Subacute osteomyelitis  
M86.4 Chronic osteomyelitis with draining sinus  
M86.5 Other chronic osteomyelitis  
M86.60 Other chronic osteomyelitis, unspecified site  
M86.67 Other chronic osteomyelitis, ankle and foot  
M86.68 Other chronic osteomyelitis, other site  
M86.69 Other chronic osteomyelitis, multiple sites  
M86.8 Other osteomyelitis  
M86.90 Unspecified osteomyelitis, multiple sites  
M86.91 Unspecified osteomyelitis, shoulder region  
M86.92 Unspecified osteomyelitis, upper arm  
M86.93 Unspecified osteomyelitis, forearm  
M86.94 Unspecified osteomyelitis, hand  
M86.95 Unspecified osteomyelitis, pelvic region and thigh  
M86.96 Unspecified osteomyelitis, lower leg  
M86.97 Unspecified osteomyelitis, ankle and foot  
M86.98 Unspecified osteomyelitis, other site  
M86.99 Unspecified osteomyelitis, site unspecified  
M90.0 Tuberculosis of bone

---

---

P36.0 Sepsis of newborn due to streptococcus, group B  
P36.1 Sepsis of newborn due to other and unspecified streptococci  
P36.2 Sepsis of newborn due to Staphylococcus aureus  
P36.3 Sepsis of newborn due to other and unspecified staphylococci  
P36.4 Sepsis of newborn due to Escherichia coli  
P36.5 Sepsis of newborn due to anaerobes  
P36.8 Other bacterial sepsis of newborn  
P36.9 Bacterial sepsis of newborn, unspecified  
P37.0 Congenital tuberculosis  
P37.2 Neonatal (disseminated) listeriosis  
A00.0 Cholera due to Vibrio cholerae 01, biovar cholerae  
A00.1 Cholera due to Vibrio cholerae 01, biovar eltor  
A00.9 Cholera, unspecified  
A01.0 Typhoid fever  
A01.1 Paratyphoid fever A  
A01.2 Paratyphoid fever B  
A01.3 Paratyphoid fever C  
A01.4 Paratyphoid fever, unspecified  
A02.0 Salmonella enteritidis  
A02.2 Localised salmonella infections  
A02.8 Other specified salmonella infections  
A02.9 Salmonella infection, unspecified  
A03.0 Shigellosis due to Shigella dysenteriae  
A03.1 Shigellosis due to Shigella flexneri  
A03.2 Shigellosis due to Shigella boydii  
A03.3 Shigellosis due to Shigella sonnei  
A03.8 Other shigellosis  
A03.9 Shigellosis, unspecified  
A04.0 Enteropathogenic Escherichia coli infection  
A04.1 Enterotoxigenic Escherichia coli infection  
A04.2 Enteroinvasive Escherichia coli infection  
A04.3 Enterohemorrhagic Escherichia coli infection  
A04.4 Other intestinal Escherichia coli infections  
A04.5 Campylobacter enteritis  
A04.6 Enteritis due to Yersinia enterocolitica  
A04.7 Enterocolitis due to Clostridium difficile  
A04.8 Other specified bacterial intestinal infections  
A04.9 Bacterial intestinal infection, unspecified  
A05.0 Foodborne staphylococcal intoxication  
A05.1 Botulism food poisoning  
A05.2 Foodborne Clostridium perfringens [Clostridium welchii] intoxication  
A05.3 Foodborne Vibrio parahaemolyticus intoxication  
A05.4 Foodborne Bacillus cereus intoxication  
A05.8 Other specified bacterial foodborne intoxications  
A05.9 Bacterial foodborne intoxication, unspecified  
A06.0 Acute amebic dysentery  
A06.1 Chronic intestinal amebiasis  
A06.2 Amebic nondysenteric colitis  
A06.3 Amoeboma of intestine  
A06.4 Amebic liver abscess  
A06.9 Amebiasis, unspecified  
A07.0 Balantidiasis  
A07.1 Giardiasis [lamblia]s  
A07.2 Cryptosporidiosis  
A07.3 Isosporiasis  
A07.8 Other specified protozoal intestinal diseases  
A07.9 Protozoal intestinal disease, unspecified  
A08.0 Rotaviral enteritis  
A08.1 Acute gastroenteropathy due to Norwalk agent  
A08.2 Adenoviral enteritis  
A08.3 Other viral enteritis  
A08.4 Viral intestinal infection, unspecified  
A08.5 Other specified intestinal infections  
A09 Infectious gastroenteritis and colitis, unspecified  
A09.0 Other and unspecified gastroenteritis and colitis of infectious origin  
A09.9 Gastroenteritis and colitis of unspecified origin  
A21.3 Gastrointestinal tularemia  
A22.2 Gastrointestinal anthrax  
B37.88 Candidiasis of other sites  
B71.0 Hymenolepiasis  
B71.9 Cestode infection, unspecified  
B76.0 Ancylostomiasis  
B78.9 Strongyloidiasis, unspecified

---

---

B81.0 Anisakiasis  
B96.81 *Helicobacter pylori* [*H. pylori*] as the cause of diseases classified to other chapters  
K52.8 Other specified noninfective gastroenteritis and colitis  
A06.5 Amebic lung abscess  
A15.0 Tuberculosis of lung  
A15.1 Tuberculosis of lung, confirmed by culture only  
A15.2 Tuberculosis of lung, confirmed histologically  
A15.3 Tuberculosis of lung, confirmed by unspecified means  
A15.4 Tuberculosis of intrathoracic lymph nodes  
A15.5 Tuberculosis of larynx, trachea and bronchus  
A15.6 Tuberculosis pleurisy  
A15.7 Primary respiratory tuberculosis  
A15.8 Other respiratory tuberculosis  
A15.9 Respiratory tuberculosis unspecified, confirmed bacteriologically and histologically  
A16.0 Tuberculosis of lung, bacteriologically and histologically negative  
A16.1 Tuberculosis of lung, bacteriological and histological examination not done  
A16.2 Tuberculosis of lung, without mention of bacteriological or histological confirmation  
A16.3 Tuberculosis of intrathoracic lymph nodes, without mention of bacteriological or histological confirmation  
A16.4 Tuberculosis of larynx, trachea and bronchus, without mention of bacteriological or histological confirmation  
A16.5 Tuberculous pleurisy, without mention of bacteriological or histological confirmation  
A16.7 Primary respiratory tuberculosis, without mention of bacteriological or histological confirmation  
A16.8 Other respiratory tuberculosis, without mention of bacteriological or histological confirmation  
A16.9 Respiratory tuberculosis unspecified, without mention of bacteriological or histological confirmation  
A19.2 Acute miliary tuberculosis, unspecified  
A19.8 Other miliary tuberculosis  
A19.9 Miliary tuberculosis, unspecified  
A20.2 Pneumonic plague  
A21.2 Pulmonary tularemia  
A22.1 Pulmonary anthrax  
A24.0 Glanders  
A31.0 Pulmonary mycobacterial infection  
A37.0 Whooping cough due to *Bordetella pertussis*  
A37.1 Whooping cough due to *Bordetella parapertussis*  
A37.8 Whooping cough due to other *Bordetella* species  
A37.9 Whooping cough, unspecified  
A42.0 Pulmonary actinomycosis  
A48.1 Legionnaires disease  
A70 Chlamydia psittaci infections  
A70 (no description found)  
B01.2 Varicella pneumonia  
B05.2 Measles complicated by pneumonia  
B34.0 Adenovirus infection, unspecified  
B37.1 Pulmonary candidiasis  
B38.0 Acute pulmonary coccidioidomycosis  
B38.1 Chronic pulmonary coccidioidomycosis  
B38.2 Pulmonary coccidioidomycosis, unspecified  
B39.0 Acute pulmonary histoplasmosis capsulati  
B39.1 Chronic pulmonary histoplasmosis capsulati  
B39.2 Pulmonary histoplasmosis capsulati, unspecified  
B39.3 Disseminated histoplasmosis capsulati  
B39.4 Histoplasmosis capsulati, unspecified  
B39.5 Histoplasmosis duboisii  
B39.9 Histoplasmosis, unspecified  
B40.0 Acute pulmonary blastomycosis  
B40.1 Chronic pulmonary blastomycosis  
B40.2 Pulmonary blastomycosis, unspecified  
B40.3 Cutaneous blastomycosis  
B40.7 Disseminated blastomycosis  
B40.8 Other forms of blastomycosis  
B41.0 Pulmonary paracoccidioidomycosis  
B42.0 Pulmonary sporotrichosis  
B44.0 Invasive pulmonary aspergillosis  
B44.1 Other pulmonary aspergillosis  
B45.0 Pulmonary cryptococcosis  
B58.3 Pulmonary toxoplasmosis  
B59 Pneumocystosis  
J05.0 Acute obstructive laryngitis [croup]  
J09 Influenza due to certain identified influenza virus  
J10.0 Influenza with pneumonia, influenza virus identified  
J10.1 Influenza due to other influenza virus with respiratory manifestations  
J11.0 Influenza with pneumonia, virus not identified  
J11.1 Influenza with other respiratory manifestations, virus not identified

---

---

J12.0 Adenoviral pneumonia  
J12.1 Respiratory syncytial virus pneumonia  
J12.2 Parainfluenza virus pneumonia  
J12.3 Human metapneumovirus pneumonia  
J12.8 Other viral pneumonia  
J12.9 Viral pneumonia, unspecified  
J13 Pneumonia due to Streptococcus pneumoniae  
J14 Pneumonia due to Hemophilus influenzae  
J15.0 Pneumonia due to Klebsiella pneumoniae  
J15.1 Pneumonia due to Pseudomonas  
J15.2 Pneumonia due to staphylococcus  
J15.3 Pneumonia due to streptococcus, group B  
J15.4 Pneumonia due to other streptococci  
J15.5 Pneumonia due to Escherichia coli  
J15.6 Pneumonia due to other aerobic Gram-negative bacteria  
J15.7 Pneumonia due to Mycoplasma pneumoniae  
J15.8 Pneumonia due to other specified bacteria  
J15.9 Unspecified bacterial pneumonia  
J16.0 Chlamydial pneumonia  
J16.8 Pneumonia due to other specified infectious organisms  
J17.0 Pneumonia in bacterial diseases classified elsewhere  
J17.1 Pneumonia in viral diseases classified elsewhere  
J17.2 Pneumonia in mycoses  
J17.3 Pneumonia in parasitic diseases  
J17.8 Pneumonia in other diseases classified elsewhere  
J18.0 Bronchopneumonia, unspecified organism  
J18.1 Lobar pneumonia, unspecified  
J18.8 Other pneumonia, unspecified organism  
J18.9 Pneumonia, unspecified  
J20.0 Acute bronchitis due to Mycoplasma pneumoniae  
J20.1 Acute bronchitis due to Hemophilus influenza  
J20.2 Acute bronchitis due to streptococcus  
J20.3 Acute bronchitis due to coxsackievirus  
J20.4 Acute bronchitis due to parainfluenza virus  
J20.5 Acute bronchitis due to respiratory syncytial virus  
J20.6 Acute bronchitis due to rhinovirus  
J20.7 Acute bronchitis due to echovirus  
J20.8 Acute bronchitis due to other specified organisms  
J20.9 Acute bronchitis, unspecified  
J21.0 Acute bronchiolitis due to respiratory syncytial virus  
J21.1 Acute bronchiolitis due to human megapneumovirus  
J21.8 Acute bronchiolitis due to other specified organisms  
J21.9 Acute bronchiolitis, unspecified  
J22 Unspecified acute lower respiratory infection  
J22.0 (no description found)  
J40 Bronchitis, not specified as acute or chronic  
J41.0 Simple chronic bronchitis  
J41.1 Mucopurulent chronic bronchitis  
J41.8 Mixed simple and mucopurulent chronic bronchitis  
J42 Unspecified chronic bronchitis  
J44.0 Chronic obstructive pulmonary disease with acute lower respiratory infection  
J47 Bronchiectasis  
J65 Pneumoconiosis associated with tuberculosis  
J85.0 Gangrene and necrosis of lung  
J85.1 Abscess of lung with pneumonia  
J85.2 Abscess of lung without pneumonia  
J86.0 Pyothorax with fistula  
J86.9 Pyothorax without fistula  
P23.0 Congenital pneumonia due to viral agent  
P23.2 Congenital pneumonia due to staphylococcus  
P23.3 Congenital pneumonia due to staphylococcus, group B  
P23.4 Congenital pneumonia due to Escherichia coli  
P23.5 Congenital pneumonia due to Pseudomonas  
P23.6 Congenital pneumonia due to other bacterial agents  
P23.8 Congenital pneumonia due to other organisms  
P23.9 Congenital pneumonia, unspecified  
A31.1 Cutaneous mycobacterial infection  
A46 Erysipelas  
B00.0 Eczema herpeticum  
B35.0 Tinea barbae and tinea capitis  
B35.1 Tinea unguium  
B35.2 Tinea manuum  
B35.3 Tinea pedis

---

---

B35.4 Tinea corporis  
B35.5 Tinea imbricate  
B35.6 Tinea cruris  
B35.8 Other dermatophytoses  
B35.9 Dermatophytosis, unspecified  
B36.0 Pityriasis versicolour  
B36.1 Tinea nigra  
B36.2 White piedra  
B36.3 Black piedra  
B36.8 Other specified superficial mycoses  
B37.2 Candidiasis of skin and nail  
B85.0 Pediculosis due to *Pediculus humanus capitis*  
B85.1 Pediculosis due to *Pediculus humanus corporis*  
B85.2 Pediculosis, unspecified  
B85.3 Phthiriasis  
B85.4 Mixed pediculosis and phthiriasis  
B86 Scabies  
B87.9 Myiasis, unspecified  
B88.0 Other acariasis  
B88.1 Tungiasis [sandflea infestation]  
B88.2 Other arthropod infestations  
B88.3 External hirudiniasis  
B88.8 Other specified infestations  
B88.9 Infestation, unspecified  
H60.3 Other infective otitis externa  
L00 Staphylococcal scalded skin syndrome  
L01.0 Impetigo [any organism] [any site]  
L02.0 Cutaneous abscess, furuncle and carbuncle of face  
L02.1 Cutaneous abscess, furuncle and carbuncle of neck  
L02.2 Cutaneous abscess, furuncle and carbuncle of trunk  
L02.3 Cutaneous abscess, furuncle and carbuncle of buttock  
L02.4 Cutaneous abscess, furuncle and carbuncle of limb  
L02.8 Cutaneous abscess, furuncle and carbuncle of other sites  
L02.9 Cutaneous abscess, furuncle and carbuncle, unspecified  
L03.01 Cellulitis of finger  
L03.02 Cellulitis of toe  
L03.10 Cellulitis of upper limb  
L03.11 Cellulitis of lower limb  
L03.2 Cellulitis of face  
L03.3 Cellulitis of trunk  
L03.8 Cellulitis of other sites  
L03.9 Cellulitis, unspecified  
L05.0 Pilonidal cyst with abscess  
L05.9 Pilonidal cyst without abscess  
L08.0 Pyoderma  
L08.1 Erythrasma  
L08.8 Other specified local infections of skin and subcutaneous tissue  
L08.9 Local infection of the skin and subcutaneous tissue, unspecified  
L13.0 Dermatitis herpetiformis  
L30.3 Infective dermatitis  
L88 Pyoderma gangrenosum  
M60.09 Infective myositis, multiple sites  
M63.0 Myositis in bacterial diseases classified elsewhere  
M63.1 Myositis in protozoal and parasitic infections classified elsewhere  
M63.2 Myositis in other infectious diseases classified elsewhere  
M65.0 Abscess of tendon sheath  
M65.1 Other infective (teno)synovitis  
M68.0 Synovitis and tenosynovitis in bacterial diseases classified elsewhere  
M71.0 Abscess of bursa  
M71.1 Other infective bursitis  
O91.00 Infection of nipple associated with childbirth, without mention of attachment difficulty  
O91.10 Abscess of breast associated with childbirth, without mention of attachment difficulty  
P39.0 Neonatal infective mastitis  
P39.4 Neonatal skin infection  
A36.0 Pharyngeal diphtheria  
A36.1 Nasopharyngeal diphtheria  
A36.2 Laryngeal diphtheria  
B05.3 Measles complicated by otitis media  
H65.0 Acute serous otitis media  
H65.1 Other acute nonsuppurative otitis media  
H65.2 Chronic serous otitis media  
H65.3 Chronic mucoid otitis media  
H65.4 Other chronic nonsuppurative otitis media

---



---

H65.9 Nonsuppurative otitis media, unspecified  
H66.0 Acute suppurative otitis media  
H66.1 Chronic tubotympanic suppurative otitis media  
H66.2 Chronic atticoantral suppurative otitis media  
H66.3 Other chronic suppurative otitis media  
H66.4 Suppurative otitis media, unspecified  
H66.9 Otitis media, unspecified  
H67.0 Otitis media in bacterial diseases classified elsewhere  
H67.8 Otitis media in other diseases classified elsewhere  
H68.0 Eustachian salpingitis  
H70.0 Acute mastoiditis  
H70.1 Chronic mastoiditis  
H70.2 Petrositis  
H70.8 Other mastoiditis and related conditions  
H70.9 Mastoiditis, unspecified  
H72.0 Central perforation of tympanic membrane  
H72.1 Attic perforation of tympanic membrane  
H72.2 Other marginal perforations of tympanic membrane  
H72.8 Other perforations of tympanic membrane  
H72.9 Perforation of tympanic membrane, unspecified  
H73.0 Acute myringitis  
H75.0 Mastoiditis in infectious and parasitic diseases classified elsewhere  
H83.0 Labyrinthitis  
H92.1 Otorrhoea  
J00 Acute nasopharyngitis [common cold]  
J01.0 Acute maxillary sinusitis  
J01.1 Acute frontal sinusitis  
J01.2 Acute ethmoidal sinusitis  
J01.3 Acute sphenoidal sinusitis  
J01.4 Acute pansinusitis  
J01.8 Other acute sinusitis  
J01.9 Acute sinusitis, unspecified  
J02.0 Streptococcal pharyngitis  
J02.8 Acute pharyngitis due to other specified organisms  
J02.9 Acute pharyngitis, unspecified  
J03.0 Streptococcal tonsillitis  
J03.8 Acute tonsillitis due to other specified organisms  
J03.9 Acute tonsillitis, unspecified  
J04.0 Acute laryngitis  
J04.1 Acute tracheitis  
J04.2 Acute laryngotracheitis  
J05.1 Acute epiglottitis  
J06.0 Acute laryngopharyngitis  
J06.8 Other acute upper respiratory infections of multiple sites  
J06.9 Acute upper respiratory infection, unspecified  
J32.0 Chronic maxillary sinusitis  
J32.1 Chronic frontal sinusitis  
J32.2 Chronic ethmoidal sinusitis  
J32.3 Chronic sphenoidal sinusitis  
J32.4 Chronic pansinusitis  
J32.8 Other chronic sinusitis  
J32.9 Chronic sinusitis, unspecified  
J34.0 Abscess, furuncle and carbuncle of nose  
J35.0 Chronic tonsillitis  
J36 Peritonsillar abscess  
A51.0 Primary genital syphilis  
A51.1 Primary anal syphilis  
A51.2 Primary syphilis of other sites  
A51.3 Secondary syphilis of skin and mucous membranes  
A51.4 Other secondary syphilis  
A51.5 Early syphilis, latent  
A51.9 Early syphilis, unspecified  
A52.9 Late syphilis, unspecified  
A53.0 Latent syphilis, unspecified as early or late  
A53.9 Syphilis, unspecified  
A54.0 Gonococcal infection of lower genitourinary tract without periurethral or accessory gland abscess  
A54.1 Gonococcal infection of lower genitourinary tract with periurethral and accessory gland abscess  
A54.2 Gonococcal pelviperitonitis and other gonococcal genitourinary infections  
A54.3 Gonococcal infection of eye  
A54.3 (no description found)  
A54.4 Gonococcal infection of musculoskeletal system  
A54.5 Gonococcal pharyngitis  
A54.6 Gonococcal infection of anus and rectum

---

---

A54.8 Other gonococcal infections  
A54.8 (no description found)  
A54.9 Gonococcal infection, unspecified  
A55 Chlamydial lymphogranuloma (venereum)  
A56.0 Chlamydial infection of lower genitourinary tract  
A56.1 Chlamydial infection of pelviperitoneum and other genitourinary organs  
A56.2 Chlamydial infection of genitourinary tract, unspecified  
A56.3 Chlamydial infection of anus and rectum  
A56.4 Chlamydial infection of pharynx  
A56.8 Sexually transmitted chlamydial infection of other sites  
A57 Chancroid  
A58 Granuloma inguinale  
A59.0 Urogenital trichomoniasis  
A59.0 (no description found)  
A60.0 Herpesviral infection of genitalia and urogenital tract  
A60.1 Herpesviral infection of perianal skin and rectum  
A60.9 Anogenital herpesviral infection, unspcified  
A63.0 Anogenital (venereal) warts  
A63.8 Other specified predominantly sexually transmitted diseases  
A64 Unspecified sexually transmitted disease  
B37.3 Candidiasis of vulva and vagina  
B37.4 Candidiasis of other urogenital sites  
N13.6 Pyonephrosis  
N15.1 Renal and perinephric abscess  
N30.0 Acute cystitis  
N30.8 Other cystitis, abscess of bladder  
N34.0 Urethral abscess  
N35.1 Postinfective urethral stricture, not elsewhere classified  
N39.0 Urinary tract infection, site not specified  
N41.0 Acute prostatitis  
N41.2 Abscess of prostate  
N43.1 Infected hydrocele  
N45.0 Orchitis, epididymitis and epididymo-orchitis with abscess  
N45.9 Orchitis, epididymitis and epididymo-orchits without abscess  
N51.2 Balanitis in diseases classified elsewhere  
N70.0 Acute salpingitis and oophoritis  
N73.0 Acute parametritis and pelvic cellulitis  
N73.1 Chronic parametritis and pelvic cellulitis  
N73.2 Unspecified parametritis and pelvic cellulitis  
N73.3 Female acute pelvic peritonitis  
N73.4 Female chronic pelvic peritonitis  
N73.9 Female pelvic inflammatory disease, unspecified  
N74.2 Female syphilitic pelvic inflammatory disease  
N74.3 Female gonococcal pelvic inflammatory disease  
N74.4 Female chlamydial pelvic inflammatory disease  
N75.0 Cyst of Bartholins gland  
N75.1 Abscess of Bartholins gland  
N76.0 Acute vaginitis  
N76.4 Abscess of vulva  
O03.0 Spontaneous abortion, incomplete, complicated by genital tract and pelvic infection  
O03.5 Spontaneous abortion, complete or unspecified, complicated by genital tract and pelvic infection  
O08.0 Genital tract and pelvic infection following ectopic and molar pregnancy  
O26.4 Herpes gestationis  
O86.2 Urinary tract infection following delivery  
O98.1 Syphilis complicating pregnancy, childbirth and the puerperium  
O98.2 Gonorrhoea complicating pregnancy, childbirth and the puerperium  
P39.3 Neonatal urinary tract infection  
A80.1 Acute paralytic poliomyelitis, wild virus, imported  
A80.2 Acute paralytic poliomyelitis, wild virus, indigenous  
A80.3 Acute paralytic poliomyelitis, other and unspecified  
A80.4 Acute nonparalytic poliomyelitis  
A80.9 Acute poliomyelitis, unspecified  
A81.8 Other atypical virus infections of central nervous system  
A81.9 Atypical virus infection of central nervous system, unspecified  
A82.0 Sylvatic rabies  
A82.1 Urban rabies  
A82.9 Rabies, unspecified  
A83.0 Japanese encephalitis  
A83.1 Western equine encephalitis  
A83.2 Eastern equine encephalitis  
A83.3 St Louis encephalitis  
A83.4 Australian encephalitis  
A83.5 California encephalitis

---

---

A83.6 Rocio virus disease  
A83.8 Other mosquito-borne viral encephalitis  
A83.9 Mosquito-borne viral encephalitis, unspecified  
A84.0 Far Eastern tick-borne encephalitis [Russian spring-summer encephalitis]  
A84.1 Central European tick-borne encephalitis  
A84.8 Other tick-borne viral encephalitis  
A84.9 Tick-borne viral encephalitis, unspecified  
A85.0 Enteroviral encephalitis  
A85.1 Adenoviral encephalitis  
A85.2 Arthropod-borne viral encephalitis, unspecified  
A85.8 Other specified viral encephalitis  
A86 Unspecified viral encephalitis  
A87.0 Enteroviral meningitis  
A87.1 Adenoviral meningitis  
A87.2 Lymphocytic choriomeningitis  
A87.8 Other viral meningitis  
A87.9 Viral meningitis, unspecified  
A88.0 Enteroviral exanthematous fever  
A88.8 Other specified viral infections of central nervous system  
A89 Unspecified viral infection of central nervous system  
A90 Dengue fever [classical dengue]  
A91 Dengue haemorrhagic fever  
A92.0 Chikungunya virus disease  
A92.1 O'nyong-nyong fever  
A92.2 Venezuelan equine fever  
A92.3 West Nile virus infection  
A92.4 Rift Valley fever  
A92.8 Other specified mosquito-borne viral fevers  
A92.9 Mosquito-borne viral fever, unspecified  
A93.0 Oropouche virus disease  
A93.2 Colorado tick fever  
A93.8 Other specified arthropod-borne viral fevers  
A94 Unspecified arthropod-borne viral fever  
A95.0 Sylvatic yellow fever  
A95.1 Urban yellow fever  
A95.9 Yellow fever, unspecified  
A96.0 Junin haemorrhagic fever  
A96.1 Machupo haemorrhagic fever  
A96.2 Lassa fever  
A96.8 Other arenaviral hemorrhagic fevers  
A96.9 Arenaviral haemorrhagic fever, unspecified  
A98.0 Crimean-Congo hemorrhagic fever  
A98.1 Omsk hemorrhagic fever  
A98.2 Kyasanur Forest disease  
A98.3 Marburg virus disease  
A98.4 Ebola virus disease  
A98.5 Hemorrhagic fever with renal syndrome  
A98.8 Other specified viral haemorrhagic fevers  
A99 Unspecified viral haemorrhagic fever  
B00.1 Herpesviral vesicular dermatitis  
B00.2 Herpesviral gingivostomatitis and pharyngotonsillitis  
B00.3 Herpesviral meningitis  
B00.4 Herpesviral encephalitis  
B00.5 Herpesviral ocular disease  
B00.7 Disseminated herpesviral disease  
B00.8 Other forms of herpesviral infection  
B00.9 Herpesviral infection, unspecified  
B01.0 Varicella meningitis  
B01.1 Varicella encephalitis  
B01.8 Varicella with other complications  
B01.9 Varicella without complication  
B02.0 Zoster encephalitis  
B02.1 Zoster meningitis  
B02.2 Zoster with other nervous system involvement  
B02.3 Zoster ocular disease  
B02.7 Disseminated zoster  
B02.8 Zoster with other complications  
B02.9 Zoster without complications  
B03 Smallpox  
B04 Monkeypox  
B05.0 Measles complicated by encephalitis  
B05.1 Measles complicated by meningitis  
B05.4 Measles with intestinal complications

---

---

B05.8 Measles with other complications  
B05.9 Measles without complication  
B06.0 Rubella with neurological complications  
B06.8 Rubella with other complications  
B06.9 Rubella without complication  
B07 Viral warts  
B08.0 Other orthopoxvirus infections  
B08.1 Molluscum contagiosum  
B08.2 Exanthema subitum [sixth disease]  
B08.3 Erythema infectiosum [fifth disease]  
B08.4 Enteroviral vesicular stomatitis with exanthem  
B08.5 Enteroviral vesicular pharyngitis  
B08.8 Other specified viral infections characterized by skin and mucous membrane lesions  
B09 Unspecified viral infection characterized by skin and mucous membrane lesions  
B15.0 Hepatitis A with hepatic coma  
B15.9 Hepatitis A without hepatic coma  
B16.0 Acute hepatitis B with delta-agent with hepatic coma  
B16.1 Acute hepatitis B with delta-agent without hepatic coma  
B16.2 Acute hepatitis B without delta-agent with hepatic coma  
B16.9 Acute hepatitis B without delta-agent and without hepatic coma  
B17.0 Acute delta-(super) infection of hepatitis B carrier  
B17.1 Acute hepatitis C  
B17.2 Acute hepatitis E  
B17.8 Other specified acute viral hepatitis  
B17.9 Acute viral hepatitis, unspecified  
B18.0 Chronic viral hepatitis B with delta-agent  
B18.1 Chronic viral hepatitis B without delta-agent  
B18.2 Chronic viral hepatitis C  
B18.8 Other chronic viral hepatitis  
B18.9 Chronic viral hepatitis, unspecified  
B19.0 Unspecified viral hepatitis with hepatic coma  
B19.9 Unspecified viral hepatitis without hepatic coma  
B20.0 HIV disease resulting in mycobacterial infection  
B20.1 HIV disease resulting in other bacterial infections  
B20.2 HIV disease resulting in cytomegaloviral disease  
B20.3 HIV disease resulting in other viral infections  
B20.4 HIV disease resulting in candidiasis  
B20.5 HIV disease resulting in other mycoses  
B20.6 HIV disease resulting in Pneumocystis jirovecii pneumonia  
B20.7 HIV disease resulting in multiple infections  
B20.8 HIV disease resulting in other infectious and parasitic diseases  
B20.9 HIV disease resulting in unspecified infectious or parasitic  
B21.0 HIV disease resulting in Kaposi sarcoma  
B21.1 HIV disease resulting in Burkitt lymphoma  
B21.2 HIV disease resulting in other types of non-Hodgkin lymphoma  
B21.3 HIV disease resulting in other malignant neoplasms of lymphoid, haematopoietic and related tissue  
B21.7 HIV disease resulting in multiple malignant neoplasms  
B21.8 HIV disease resulting in other malignant neoplasms  
B21.9 HIV disease resulting in unspecified malignant neoplasm  
B22.0 HIV disease resulting in encephalopathy  
B22.1 HIV disease resulting in lymphoid interstitial pneumonitis  
B22.2 HIV disease resulting in wasting syndrome  
B22.7 HIV disease resulting in multiple diseases classified elsewhere  
B23.0 Acute HIV infection syndrome  
B23.1 HIV disease resulting in (persistent) generalized lymphadenopathy  
B23.2 HIV disease resulting in haematological and immunological abnormalities, not elsewhere classified  
B23.8 HIV disease resulting in other specified conditions  
B24 Unspecified human immunodeficiency virus [HIV] disease  
B25.0 Cytomegaloviral pneumonitis  
B25.1 Cytomegaloviral hepatitis  
B25.2 Cytomegaloviral pancreatitis  
B25.8 Other cytomegaloviral diseases  
B25.9 Cytomegaloviral disease, unspecified  
B26.0 Mumps orchitis  
B26.1 Mumps meningitis  
B26.2 Mumps encephalitis  
B26.3 Mumps pancreatitis  
B26.8 Mumps with other complications  
B26.8 (no description found)  
B26.9 Mumps without complication  
B27.0 Gammaherpesviral mononucleosis  
B27.1 Cytomegaloviral mononucleosis  
B27.8 Other infectious mononucleosis

---

---

|  |                                                                                           |
|--|-------------------------------------------------------------------------------------------|
|  | B27.9 Infectious mononucleosis, unspecified                                               |
|  | B30.0 Keratoconjunctivitis due to adenovirus                                              |
|  | B30.1 Conjunctivitis due to adenovirus                                                    |
|  | B30.2 (no description found)                                                              |
|  | B30.3 Acute epidemic hemorrhagic conjunctivitis (enteroviral)                             |
|  | B30.8 Other viral conjunctivitis                                                          |
|  | B30.9 Viral conjunctivitis, unspecified                                                   |
|  | B33.0 Epidemic myalgia                                                                    |
|  | B33.1 Ross River disease                                                                  |
|  | B33.2 Viral carditis                                                                      |
|  | B33.3 Retrovirus infections, not elsewhere classified                                     |
|  | B33.4 Hantavirus (cardio-) pulmonary syndrome                                             |
|  | B33.8 Other specified viral diseases                                                      |
|  | B34.1 Enterovirus infection, unspecified                                                  |
|  | B34.2 Coronavirus infection, unspecified site                                             |
|  | B34.3 Parvovirus infection, unspecified site                                              |
|  | B34.4 Papovavirus infection, unspecified                                                  |
|  | B34.8 Other viral infections of unspecified site                                          |
|  | B34.9 Viral infection, unspecified                                                        |
|  | B97.0 Adenovirus as the cause of diseases classified to other chapters                    |
|  | B97.1 Enterovirus as the cause of diseases classified to other chapters                   |
|  | B97.2 Coronavirus as the cause of diseases classified to other chapters                   |
|  | B97.3 Retrovirus as the cause of diseases classified to other chapters                    |
|  | B97.4 Respiratory syncytial virus as the cause of diseases classified to other chapters   |
|  | B97.5 Reovirus as the cause of diseases classified to other chapters                      |
|  | B97.6 Parvovirus as the cause of diseases classified to other chapters                    |
|  | B97.7 Papillomavirus as the cause of diseases classified to other chapters                |
|  | B97.8 Other viral agents as the cause of diseases classified to other chapters            |
|  | G02.0 Meningitis in viral diseases classified elsewhere                                   |
|  | G05.1 Encephalitis, myelitis and encephalomyelitis in viral diseases classified elsewhere |
|  | H19.1 Herpesviral keratitis and keratoconjunctivitis                                      |
|  | I41.1 Myocarditis in viral diseases classified elsewhere                                  |
|  | J10.8 Influenza with other manifestations, influenza virus identified                     |
|  | J11 Influenza, virus not identified                                                       |
|  | J11.8 Influenza with other manifestations, virus not identified                           |
|  | M01.4 Rubella arthritis                                                                   |
|  | M01.50 Arthritis in other viral diseases classified elsewhere, multiple sites             |
|  | M01.51 Arthritis in other viral diseases classified elsewhere, shoulder region            |
|  | M01.52 Arthritis in other viral diseases classified elsewhere, upper arm                  |
|  | M01.53 Arthritis in other viral diseases classified elsewhere, forearm                    |
|  | M01.54 Arthritis in other viral diseases classified elsewhere, hand                       |
|  | M01.55 Arthritis in other viral diseases classified elsewhere, pelvic region and thigh    |
|  | M01.56 Arthritis in other viral diseases classified elsewhere, lower leg                  |
|  | M01.57 Arthritis in other viral diseases classified elsewhere, ankle and foot             |
|  | M01.58 Arthritis in other viral diseases classified elsewhere, other site                 |
|  | M01.59 Arthritis in other viral diseases classified elsewhere, site unspecified           |
|  | O98.4 Viral hepatitis complicating pregnancy, childbirth and the puerperium               |
|  | O98.5 Other viral diseases complicating pregnancy, childbirth and the puerperium          |
|  | P35.0 Congenital rubella syndrome                                                         |
|  | P35.1 Congenital cytomegalovirus infection                                                |
|  | P35.2 Congenital herpesviral [herpes simplex] infection                                   |
|  | P35.3 Congenital viral hepatitis                                                          |
|  | P35.8 Other congenital viral diseases                                                     |
|  | P35.9 Congenital viral disease, unspecified                                               |
|  | Z21 Asymptomatic human immunodeficiency virus [HIV] infection status                      |

---

|               |                                                                       |
|---------------|-----------------------------------------------------------------------|
|               | J30-J309 Vasomotor and allergic rhinitis                              |
|               | J31-J312 Chronic rhinitis, nasopharyngitis and pharyngitis            |
|               | J32-J329 Chronic sinusitis                                            |
|               | J33-J339 Nasal polyp                                                  |
|               | J34-J349 Other and unspecified disorders of nose and nasal sinuses    |
|               | J3501-J359 Chronic diseases of tonsils and adenoids                   |
|               | J36 Peritonsillar abscess                                             |
|               | J37-J371 Chronic laryngitis and laryngotracheitis                     |
|               | J38-J387 Diseases of vocal cords and larynx, not elsewhere classified |
| Respiratory   | J39-J399 Other diseases of upper respiratory tract                    |
| non-infection | J40 Bronchitis, not specified as acute or chronic                     |
|               | J41 Simple and mucopurulent chronic bronchitis                        |
|               | J42 Unspecified chronic bronchitis                                    |
|               | J43 Emphysema                                                         |
|               | J44 Other chronic obstructive pulmonary disease                       |
|               | J45 Asthma                                                            |
|               | J47 Bronchiectasis                                                    |
|               | J80 Acute respiratory distress syndrome                               |

---

|                                   |                                                                                                                                                                                                                                                                                                                                                                                                                                                                                                                                                                                                                                                                                                                                                                                                                                                                                                                                                                                                                                                                                                                                                                                                                                                                                                                                                                                                                                           |
|-----------------------------------|-------------------------------------------------------------------------------------------------------------------------------------------------------------------------------------------------------------------------------------------------------------------------------------------------------------------------------------------------------------------------------------------------------------------------------------------------------------------------------------------------------------------------------------------------------------------------------------------------------------------------------------------------------------------------------------------------------------------------------------------------------------------------------------------------------------------------------------------------------------------------------------------------------------------------------------------------------------------------------------------------------------------------------------------------------------------------------------------------------------------------------------------------------------------------------------------------------------------------------------------------------------------------------------------------------------------------------------------------------------------------------------------------------------------------------------------|
|                                   | <p>J81 Pulmonary edema<br/> J82 Pulmonary eosinophilia, not elsewhere classified<br/> J84 Other interstitial pulmonary diseases<br/> J85 Abscess of lung and mediastinum<br/> J86 Pyothorax<br/> J90 Pleural effusion, not elsewhere classified<br/> J91 Pleural effusion in conditions classified elsewhere<br/> J92 Pleural plaque<br/> J93 Pneumothorax and air leak<br/> J94 Other pleural conditions<br/> J95 Intraoperative and postprocedural complications and disorders of respiratory system, not elsewhere classified<br/> J96 Respiratory failure, not elsewhere classified<br/> J98 Other respiratory disorders<br/> J99 Respiratory disorders in diseases classified elsewhere</p>                                                                                                                                                                                                                                                                                                                                                                                                                                                                                                                                                                                                                                                                                                                                          |
| Gastrointestinal<br>non-infection | <p>K20 Esophagitis<br/> K21 Gastro-esophageal reflux disease<br/> K22 Other diseases of esophagus<br/> K23 Disorders of esophagus in diseases classified elsewhere<br/> K25 Gastric ulcer<br/> K26 Duodenal ulcer<br/> K27 Peptic ulcer, site unspecified<br/> K28 Gastrojejunal ulcer<br/> K29 Gastritis and duodenitis<br/> K30 Functional dyspepsia<br/> K31 Other diseases of stomach and duodenum<br/> K90 Intestinal malabsorption<br/> K91 Intraoperative and postprocedural complications and disorders of digestive system, not elsewhere classified<br/> K92 Other diseases of digestive system<br/> K40 Inguinal hernia<br/> K41 Femoral hernia<br/> K42 Umbilical hernia<br/> K43 Ventral hernia<br/> K44 Diaphragmatic hernia<br/> K45 Other abdominal hernia<br/> K46 Unspecified abdominal hernia<br/> K50 Crohn's disease<br/> K51 Ulcerative colitis<br/> K52 Other and unspecified noninfective gastroenteritis and colitis<br/> K55 Vascular disorders of intestine<br/> K56 Paralytic ileus and intestinal obstruction without hernia<br/> K57 Diverticular disease of intestine<br/> K58 Irritable bowel syndrome<br/> K59 Other functional intestinal disorders<br/> K60 Fissure and fistula of anal and rectal regions<br/> K61 Abscess of anal and rectal regions<br/> K62 Other diseases of anus and rectum<br/> K63 Other diseases of intestine<br/> K65 Peritonitis<br/> K66 Other disorders of peritoneum</p> |
| Oral cavity                       | <p>K00-K09 Diseases of oral cavity and salivary glands<br/> K01 Dysphagia<br/> K02-K029 Dental caries<br/> K03-K039 Other diseases of hard tissues of teeth<br/> K04-K0499 Diseases of pulp and periapical tissues<br/> K05-K056 Gingivitis and periodontal diseases<br/> K06-K069 Other disorders of gingiva and eentulous alveolar ridge<br/> K08-K089 Other disorders of teeth and supporting structures<br/> K09-K099 Cysts of oral region, not elsewhere classified<br/> K11-K119 Diseases of salivary glands<br/> K12-K1239 Stomatitis and related lesions<br/> K13-K1379 Other diseases of lip and oral mucosa<br/> K14-K149 Diseases of tongue<br/> R1310 Dysphagia<br/> Z012 Encounter for dental examination and cleaning<br/> Z463 Encounter for fitting and adjustment of dental prosthetic device<br/> Z464 Encounter for fitting and adjustment of orthodontic device</p>                                                                                                                                                                                                                                                                                                                                                                                                                                                                                                                                                   |
| Genitourinary<br>non-infection    | <p>N00 Acute nephritic syndrome<br/> N01 Rapidly progressive nephritic syndrome<br/> N02 Recurrent and persistent haematuria<br/> N03 Chronic nephritic syndrome<br/> N04 Nephrotic syndrome<br/> N05 Unspecified nephritic syndrome<br/> N06 Isolated proteinuria with specified morphological lesion</p>                                                                                                                                                                                                                                                                                                                                                                                                                                                                                                                                                                                                                                                                                                                                                                                                                                                                                                                                                                                                                                                                                                                                |

---

|               |                                                                                         |
|---------------|-----------------------------------------------------------------------------------------|
|               | N07 Hereditary nephropathy, not elsewhere classified                                    |
|               | N08 Glomerular disorders in diseases classified elsewhere                               |
|               | N10 Acute tubulo-interstitial nephritis                                                 |
|               | N11 Chronic tubulo-interstitial nephritis                                               |
|               | N12 Tubulo-interstitial nephritis, not specified as acute or chronic                    |
|               | N13 Obstructive and reflux uropathy                                                     |
|               | N14 Drug- and heavy-metal-induced tubulo-interstitial and tubular conditions            |
|               | N15 Other renal tubulo-interstitial diseases                                            |
|               | N16 Renal tubulo-interstitial disorders in diseases classified elsewhere                |
|               | N17 Acute renal failure                                                                 |
|               | N18 Chronic renal failure                                                               |
|               | N19 Unspecified renal failure                                                           |
|               | N20 Calculus of kidney and ureter                                                       |
|               | N21 Calculus of lower urinary tract                                                     |
|               | N22 Calculus of urinary tract in diseases classified elsewhere                          |
|               | N23 Unspecified renal colic                                                             |
|               | N25 Disorders resulting from impaired renal tubular function                            |
|               | N26 Unspecified contracted kidney                                                       |
|               | N27 Small kidney of unknown cause                                                       |
|               | N28 Other disorders of kidney and ureter, not elsewhere classified                      |
|               | N29 Other disorders of kidney and ureter in diseases classified elsewhere               |
|               | N30 Cystitis                                                                            |
|               | N31 Neuromuscular dysfunction of bladder, not elsewhere classified                      |
|               | N32 Other disorders of bladder                                                          |
|               | N33 Bladder disorders in diseases classified elsewhere                                  |
|               | N34 Urethritis and urethral syndrome                                                    |
|               | N35 Urethral stricture                                                                  |
|               | N36 Other disorders of urethra                                                          |
|               | N37 Urethral disorders in diseases classified elsewhere                                 |
|               | N39 Other disorders of urinary system                                                   |
|               | N40 Hyperplasia of prostate                                                             |
|               | N41 Inflammatory diseases of prostate                                                   |
|               | N42 Other disorders of prostate                                                         |
|               | N43 Hydrocele and spermatocele                                                          |
|               | N44 Torsion of testis                                                                   |
|               | N45 Orchitis and epididymitis                                                           |
|               | N46 Male infertility                                                                    |
|               | N47 Redundant prepuce, phimosis and paraphimosis                                        |
|               | N48 Other disorders of penis                                                            |
|               | N49 Inflammatory disorders of male genital organs, not elsewhere classified             |
|               | N50 Other disorders of male genital organs                                              |
|               | N51 Disorders of male genital organs in diseases classified elsewhere                   |
|               | N60 Benign mammary dysplasia                                                            |
|               | N61 Inflammatory disorders of breast                                                    |
|               | N62 Hypertrophy of breast                                                               |
|               | N63 Unspecified lump in breast                                                          |
|               | N64 Other disorders of breast                                                           |
|               | N70 Salpingitis and oophoritis                                                          |
|               | N71 Inflammatory disease of uterus, except cervix                                       |
|               | N72 Inflammatory disease of cervix uteri                                                |
|               | N73 Other female pelvic inflammatory diseases                                           |
|               | N74 Female pelvic inflammatory disorders in diseases classified elsewhere               |
|               | N75 Diseases of Bartholin's gland                                                       |
|               | N76 Other inflammation of vagina and vulva                                              |
|               | N77 Vulvovaginal ulceration and inflammation in diseases classified elsewhere           |
|               | N80 Endometriosis                                                                       |
|               | N81 Female genital prolapse                                                             |
|               | N82 Fistulae involving female genital tract                                             |
|               | N83 Noninflammatory disorders of ovary, fallopian tube and broad ligament               |
|               | N84 Polyp of female genital tract                                                       |
|               | N85 Other noninflammatory disorders of uterus, except cervix                            |
|               | N86 Erosion and ectropion of cervix uteri                                               |
|               | N87 Dysplasia of cervix uteri                                                           |
|               | N88 Other noninflammatory disorders of cervix uteri                                     |
|               | N89 Other noninflammatory disorders of vagina                                           |
|               | N90 Other noninflammatory disorders of vulva and perineum                               |
|               | N91 Absent, scanty and rare menstruation                                                |
|               | N92 Excessive, frequent and irregular menstruation                                      |
|               | N93 Other abnormal uterine and vaginal bleeding                                         |
|               | N94 Pain and other conditions associated with female genital organs and menstrual cycle |
|               | F90-F909 Attention-deficit hyperactivity disorders                                      |
| Mental health | F91-F919 Conduct disorders                                                              |
|               | F93-F939 Emotional disorders with onset specific to childhood                           |

---

|                      |                                                                                                                                                                                                                                                                                                                                                                                                                                                                                                                                                                                                                                                                                                                                                                                                                                                                                                                                                                                                                                                                                                                                                                                                                                                                                                                                                                                                                                                                                                                                                                                                                                                                                                                                                                                                                                                                                                                                                                                                            |
|----------------------|------------------------------------------------------------------------------------------------------------------------------------------------------------------------------------------------------------------------------------------------------------------------------------------------------------------------------------------------------------------------------------------------------------------------------------------------------------------------------------------------------------------------------------------------------------------------------------------------------------------------------------------------------------------------------------------------------------------------------------------------------------------------------------------------------------------------------------------------------------------------------------------------------------------------------------------------------------------------------------------------------------------------------------------------------------------------------------------------------------------------------------------------------------------------------------------------------------------------------------------------------------------------------------------------------------------------------------------------------------------------------------------------------------------------------------------------------------------------------------------------------------------------------------------------------------------------------------------------------------------------------------------------------------------------------------------------------------------------------------------------------------------------------------------------------------------------------------------------------------------------------------------------------------------------------------------------------------------------------------------------------------|
|                      | <p>F94-F949 Disorders of social functioning with onset specific to childhood and adolescence<br/> F95-F959 Tic disorder<br/> F98-F989 Other behavioral and emotional disorders with onset usually occurring in childhood and adolescence<br/> F99 Mental disorder, not otherwise specified<br/> F40-F409 Phobic anxiety disorders<br/> F41-F419 Other anxiety disorders<br/> F422-F429 Obsessive-compulsive disorder<br/> F43-F439 Reaction to severe stress, and adjustment disorders<br/> F481-F489 Other nonpsychotic mental disorders</p>                                                                                                                                                                                                                                                                                                                                                                                                                                                                                                                                                                                                                                                                                                                                                                                                                                                                                                                                                                                                                                                                                                                                                                                                                                                                                                                                                                                                                                                              |
| Injury/External      | <p>J60 Coalworker's pneumoconiosis<br/> J61 Pneumoconiosis due to asbestos and other mineral fibres<br/> J62 Pneumoconiosis due to dust containing silica<br/> J63 Pneumoconiosis due to other inorganic dusts<br/> J64 Unspecified pneumoconiosis<br/> J65 Pneumoconiosis associated with tuberculosis<br/> J66 Airway disease due to specific organic dust<br/> J67 Hypersensitivity pneumonitis due to organic dust<br/> J68 Respiratory conditions due to inhalation of chemicals, gases, fumes and vapours<br/> J69 Pneumonitis due to solids and liquids<br/> J70 Respiratory conditions due to other external agents<br/> S00-S09 Injuries to the head<br/> S10-S19 Injuries to the neck<br/> S20-S29 Injuries to the thorax<br/> S30-S39 Injuries to the abdomen, lower back, lumbar spine and pelvis<br/> S40-S49 Injuries to the shoulder and upper arm<br/> S50-S59 Injuries to the elbow and forearm<br/> S60-S69 Injuries to the wrist and hand<br/> S70-S79 Injuries to the hip and thigh<br/> S80-S89 Injuries to the knee and lower leg<br/> S90-S99 Injuries to the ankle and foot<br/> T00-T07 Injuries involving multiple body regions<br/> T08-T14 Injuries to unspecified parts of trunk, limb or body region<br/> T15-T19 Effects of foreign body entering through natural orifice<br/> T20-T32 Burns and corrosions<br/> T33-T35 Frostbite<br/> T36-T50 Poisoning by drugs, medicaments and biological substances<br/> T51-T65 Toxic effects of substances chiefly nonmedicinal as to source<br/> T66-T78 Other and unspecified effects of external causes<br/> T79 Certain early complications of trauma<br/> T80-T88 Complications of surgical and medical care, not elsewhere classified<br/> T90-T98 Sequelae of injuries, of poisoning and of other consequences of external causes<br/> P10-P15 Birth trauma<br/> V01-V99 Transport accidents<br/> W00-X59 Other external causes of accidental injury<br/> Y85-Y89 Sequelae of external causes of morbidity and mortality</p> |
| Congenital anomalies | <p>Q00-Q07 Congenital malformations of the nervous system<br/> Q10-Q18 Congenital malformations of eye, ear, face and neck<br/> Q20-Q28 Congenital malformations of the circulatory system<br/> Q30-Q34 Congenital malformations of the respiratory system<br/> Q35-Q37 Cleft lip and cleft palate<br/> Q38-Q45 Other congenital malformations of the digestive system<br/> Q50-Q56 Congenital malformations of genital organs<br/> Q60-Q64 Congenital malformations of the urinary system<br/> Q65-Q79 Congenital malformations and deformations of the musculoskeletal system<br/> Q80-Q89 Other congenital malformations<br/> Q90-Q99 Chromosomal abnormalities, not elsewhere classified</p>                                                                                                                                                                                                                                                                                                                                                                                                                                                                                                                                                                                                                                                                                                                                                                                                                                                                                                                                                                                                                                                                                                                                                                                                                                                                                                           |
| Neoplasm             | <p>C00-C96Z Malignant neoplasm<br/> D00-D099 In situ neoplasm<br/> D10-D369 Benign neoplasm<br/> D3701-D489 Neoplasm of uncertain behaviour<br/> D3A00-D3A8 Benign tumours<br/> D49-D499 Neoplasms of uncertain or unknown behaviour</p>                                                                                                                                                                                                                                                                                                                                                                                                                                                                                                                                                                                                                                                                                                                                                                                                                                                                                                                                                                                                                                                                                                                                                                                                                                                                                                                                                                                                                                                                                                                                                                                                                                                                                                                                                                   |

ICD-10 International Classification of Diseases 10th revision.



**Supplementary Table 9 | Strengthening the Reporting of Observational Studies in Epidemiology (STROBE) reporting guideline**

|                           | <b>Item no.</b> | <b>Recommendation</b>                                                                                                                                                                                                  | <b>Page no.</b> | <b>Relevant text from manuscript</b> |
|---------------------------|-----------------|------------------------------------------------------------------------------------------------------------------------------------------------------------------------------------------------------------------------|-----------------|--------------------------------------|
| <b>Title and abstract</b> | 1               | (a) Indicate the study's design with a commonly used term in the title or the abstract<br>(b) Provide in the abstract an informative and balanced summary of what was done and what was found                          | P1-5<br>P1-5    | Summary<br>Summary                   |
| <b>Introduction</b>       |                 |                                                                                                                                                                                                                        |                 |                                      |
| Background/Rationale      | 2               | Explain the scientific background and rationale for the investigation being reported                                                                                                                                   | P6-7            | Introduction                         |
| Objectives                | 3               | State specific objectives, including any prespecified hypotheses                                                                                                                                                       | P6-7            | Introduction                         |
| <b>Methods</b>            |                 |                                                                                                                                                                                                                        |                 |                                      |
| Study design              | 4               | Present key elements of study design early in the paper                                                                                                                                                                | P17-21          | Method                               |
| Setting                   | 5               | Describe the setting, locations, and relevant dates, including periods of recruitment, exposure, follow-up, and data collection                                                                                        | P17-21          | Method                               |
| Participants              | 6               | (a) <i>Cohort study</i> —Give the eligibility criteria, and the sources and methods of selection of participants. Describe methods of follow-up                                                                        | P17-21          | Method                               |
|                           |                 | <i>Case-control study</i> —Give the eligibility criteria, and the sources and methods of case ascertainment and control selection. Give the rationale for the choice of cases and controls                             |                 |                                      |
|                           |                 | <i>Cross-sectional study</i> —Give the eligibility criteria, and the sources and methods of selection of participants                                                                                                  |                 |                                      |
| Variables                 | 7               | (b) <i>Cohort study</i> —For matched studies, give matching criteria and number of exposed and unexposed<br><i>Case-control study</i> —For matched studies, give matching criteria and the number of controls per case | P17-21          | Method                               |
|                           |                 | Clearly define all outcomes, exposures, predictors, potential confounders, and effect modifiers. Give diagnostic criteria, if applicable                                                                               |                 |                                      |
| Data sources/Measurement  | 8 <sup>a</sup>  | For each variable of interest, give sources of data and details of methods of assessment (measurement). Describe comparability of assessment methods if there is more than one group                                   | P17-21          | Method                               |
| Bias                      | 9               | Describe any efforts to address potential sources of bias                                                                                                                                                              | P17-21          | Method                               |
| Study size                | 10              | Explain how the study size was arrived at                                                                                                                                                                              | P17-21          | Method                               |
| Quantitative variables    | 11              | Explain how quantitative variables were handled in the analyses. If applicable, describe which groupings were chosen and why                                                                                           | P17-21          | Method                               |
|                           |                 | (a) Describe all statistical methods, including those used to control for confounding                                                                                                                                  |                 |                                      |
|                           |                 | (b) Describe any methods used to examine subgroups and interactions                                                                                                                                                    |                 |                                      |
| Statistical methods       | 12              | (c) Explain how missing data were addressed                                                                                                                                                                            | P17-21          | Method                               |
|                           |                 | (d) <i>Cohort study</i> —If applicable, explain how loss to follow-up was<br><i>Case-control study</i> —If applicable, explain how matching of cases and controls was addressed                                        |                 |                                      |
|                           |                 | <i>Cross-sectional study</i> —If applicable, describe analytical methods taking account of sampling strategy addressed                                                                                                 |                 |                                      |
| <b>Results</b>            |                 |                                                                                                                                                                                                                        |                 |                                      |
| Participants              | 13 <sup>a</sup> | (e) Describe any sensitivity analyses                                                                                                                                                                                  | P17-21          | Method                               |
|                           |                 | (a) Report numbers of individuals at each stage of study—e.g., numbers potentially eligible, examined for eligibility, confirmed eligible, included in the study, completing follow-up, and analysed                   |                 |                                      |
|                           |                 | (b) Give reasons for non-participation at each stage                                                                                                                                                                   |                 |                                      |
|                           |                 | (c) Consider use of a flow diagram                                                                                                                                                                                     | P8-9            | Results                              |

|                          |                 |                                                                                                                                                                                                                |        |            |
|--------------------------|-----------------|----------------------------------------------------------------------------------------------------------------------------------------------------------------------------------------------------------------|--------|------------|
| Descriptive data         | 14 <sup>a</sup> | (a) Give characteristics of study participants (e.g., demographic, clinical, social) and information on exposures and potential confounders                                                                    | P8-9   | Results    |
|                          |                 | (b) Indicate number of participants with missing data for each variable of interest                                                                                                                            | P8-9   | Results    |
|                          |                 | (c) <i>Cohort study</i> —Summarise follow-up time (e.g., average and total amount)                                                                                                                             | P8-9   | Results    |
| Outcome data             | 15 <sup>a</sup> | <i>Cohort study</i> —Report numbers of outcome events or summary measures over time                                                                                                                            | P8-9   | Results    |
|                          |                 | <i>Case-control study</i> —Report numbers in each exposure category, or summary measures of exposure                                                                                                           |        |            |
| Main results             | 16              | <i>Cross-sectional study</i> —Report numbers of outcome events or summary measures                                                                                                                             |        |            |
|                          |                 | (a) Give unadjusted estimates and, if applicable, confounder-adjusted estimates and their precision (e.g., 95% confidence interval). Make clear which confounders were adjusted for and why they were included | P8-9   | Results    |
|                          |                 | (b) Report category boundaries when continuous variables were categorized                                                                                                                                      | P8-9   | Results    |
| Other analyses           | 17              | (c) If relevant, consider translating estimates of relative risk into absolute risk for a meaningful time period                                                                                               | P8-9   | Results    |
| <b>Discussion</b>        |                 | Report other analyses done—e.g., analyses of subgroups and interactions, and sensitivity analyses                                                                                                              |        |            |
| Key results              | 18              | Summarise key results with reference to study objectives                                                                                                                                                       |        |            |
| Limitations              | 19              | Discuss limitations of the study, taking into account sources of potential bias or imprecision. Discuss both direction and magnitude of any potential bias                                                     | P10-16 | Discussion |
| Interpretation           | 20              | Give a cautious overall interpretation of results considering objectives, limitations, multiplicity of analyses, results from similar studies, and other relevant evidence                                     | P10-16 | Discussion |
| Generalisability         | 21              | Discuss the generalisability (external validity) of the study results                                                                                                                                          | P10-16 | Discussion |
| <b>Other information</b> |                 |                                                                                                                                                                                                                |        |            |
| Funding                  | 22              | Give the source of funding and the role of the funders for the present study and, if applicable, for the original study on which the present article is based                                                  | P22    | Funding    |

An Explanation and Elaboration article discusses each checklist item and gives methodological background and published examples of transparent reporting. The STROBE checklist is best used in conjunction with this article (freely available on the web sites of PLoS Medicine at <http://www.plosmedicine.org/>, Annals of Internal Medicine at <http://www.annals.org/>, and Epidemiology at <http://www.epidem.com/>). Information on the STROBE initiative is available at [www.strobe-statement.org](http://www.strobe-statement.org).

<sup>a</sup>Give information separately for cases and controls in case-control studies and, if applicable, for exposed and unexposed groups in cohort and cross-sectional studies.
